# Supplementary material for: Improved current density of inverted perovskite solar cells via hole transport layer doping
Source: Royal Society of Chemistry journal article supplement (doi:10.1039/d4tc00053f), 2024-01-01
Supplement: d4tc00053f1.pdf [file d4tc00053f1.pdf]

## Supplementary information

# Improved Current Density of Inverted Perovskite Solar Cells via Hole Transport Layer Doping

Santhosh Murugan<sup>a</sup>, Xuewen Liu<sup>a</sup> and Eun-Cheol Lee<sup>\*ab</sup>

<sup>a</sup> Department of Nano Science and Technology, Graduate School, Gachon University, Seongnam-si 13120, Republic of Korea.

<sup>b</sup> Department of Physics, Gachon University, Seongnam-si 13120, Republic of Korea.

\* Corresponding author – Eun-Cheol Lee, email: [eclee@gachon.ac.kr](mailto:eclee@gachon.ac.kr)

**Table S1** Measured transmittance values of the devices.

| Device                        | Input Power<br>(W/m <sup>2</sup> ) | Output Power<br>(W/m <sup>2</sup> ) | Transmittance (%) |
|-------------------------------|------------------------------------|-------------------------------------|-------------------|
| Glass / ITO                   | 1000                               | 827                                 | 82.7              |
| Glass / ITO / Control<br>PTAA | 1000                               | 815                                 | 81.5              |
| Glass / ITO / Doped PTAA      | 1000                               | 799                                 | 79.9              |

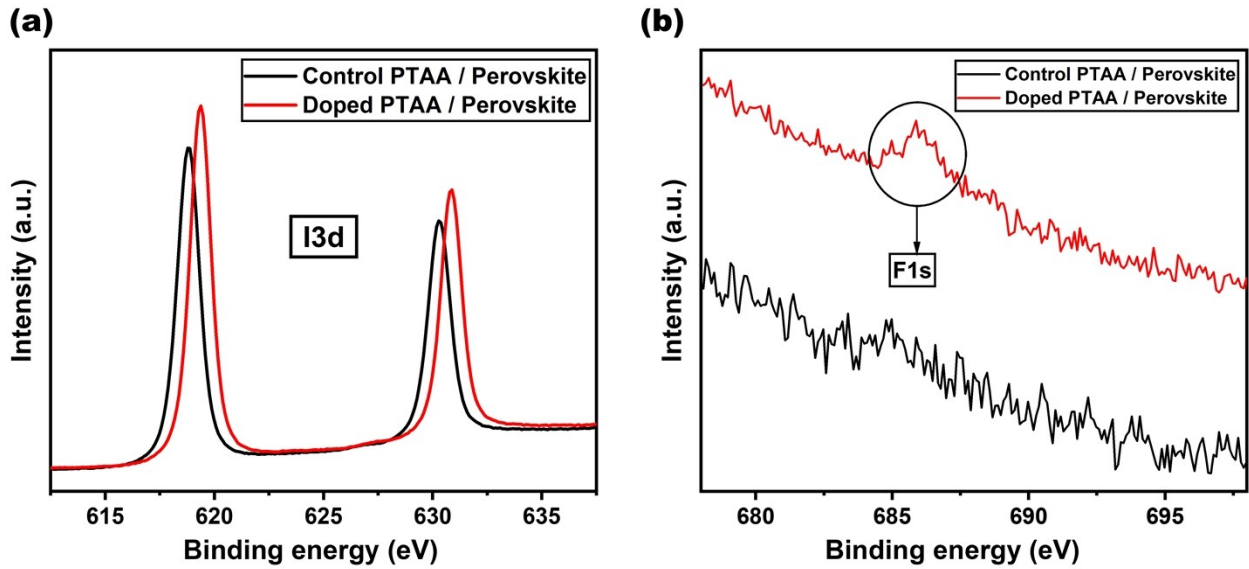

**Fig. S1** XPS analysis of (a) I 3d and (b) F 1s orbitals of perovskite films on control and doped PTAA.

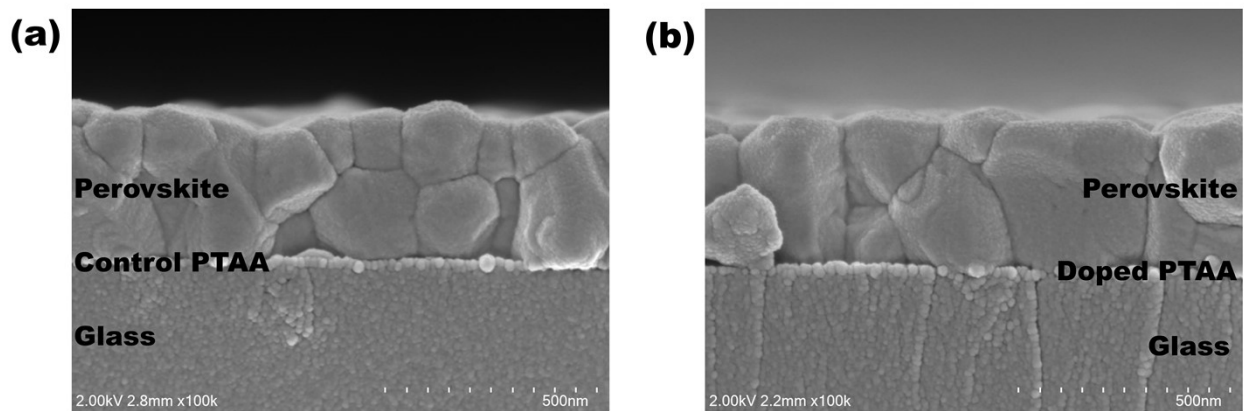

**Fig. S2** Cross sectional SEM images of (a) glass/control PTAA/perovskite and (b) glass/doped PTAA/perovskite films.

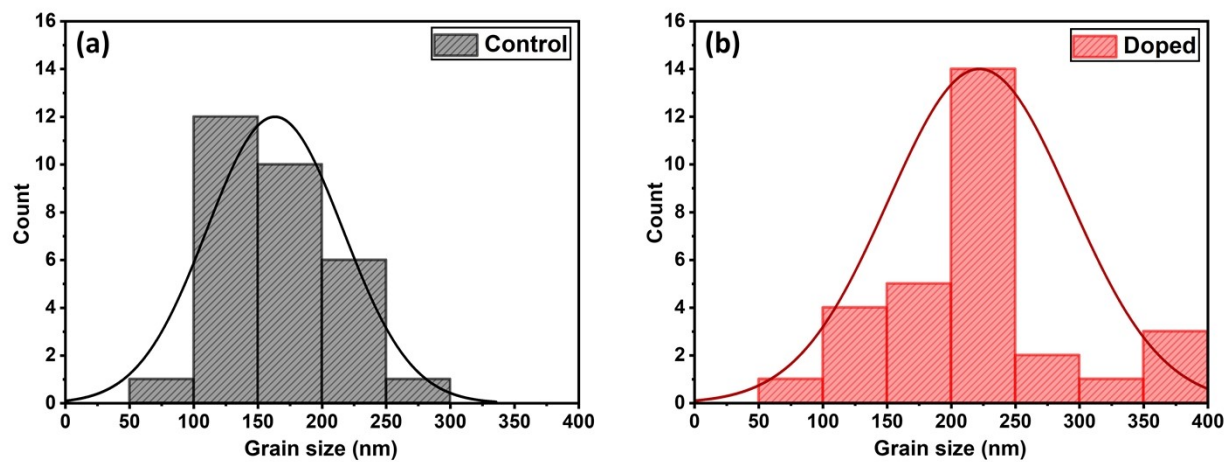

**Fig. S3** Grain size distribution of perovskite layer coated on (a) Control PTAA and (b) 5.0 wt% T35FP-doped PTAA

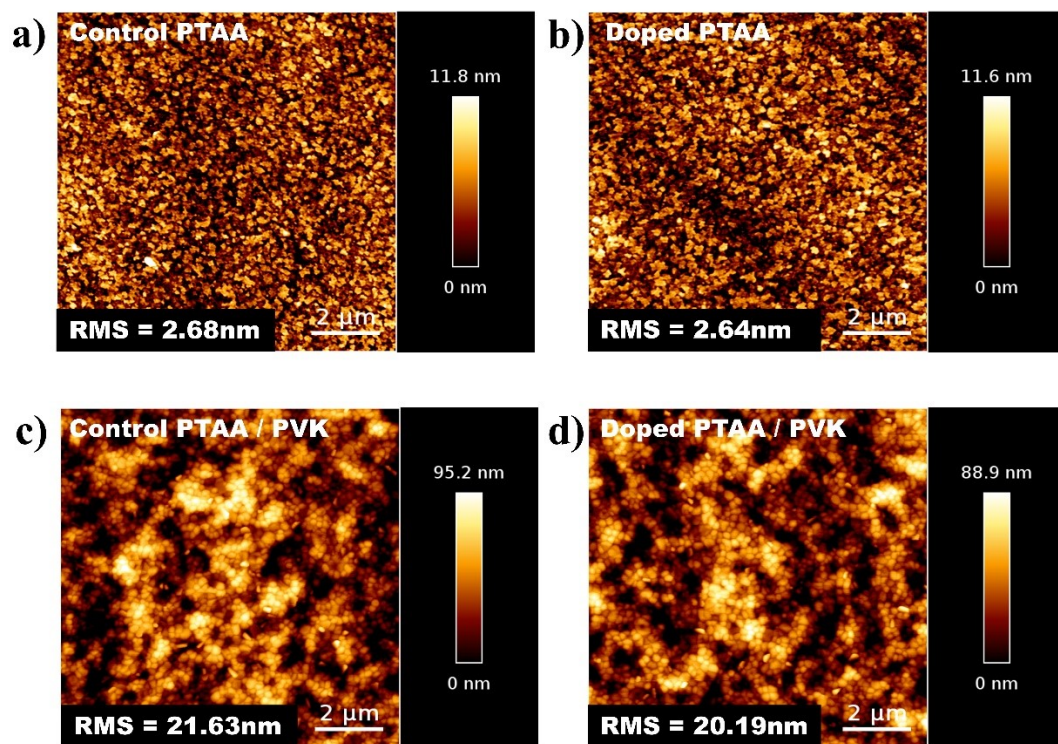

**Fig. S4** AFM images of (a) Control PTAA, (b) 5.0 wt% T35FP-doped PTAA, (c) Control PTAA/Perovskite (PVK) and (d) 5.0 wt% T35FP-doped PTAA/PVK films.

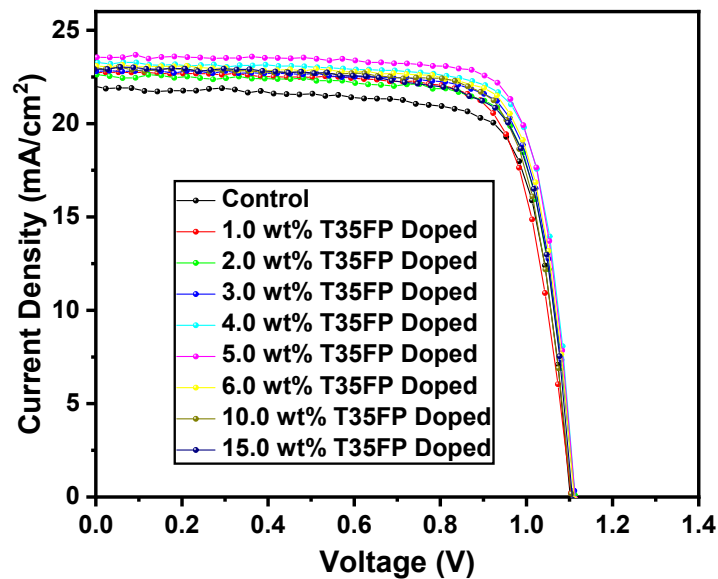

**Fig. S5** J-V curves of champion devices fabricated with various PTAA T35FP doping weight percentages.

**Table S2** Photovoltaic parameters of champion devices fabricated with various PTAA T35FP doping weight percentages.

| <b>T35FP doping</b> | <b><math>V_{oc}</math> (V)</b> | <b><math>J_{sc}</math> (mA/cm<sup>2</sup>)</b> | <b>FF (%)</b> | <b>PCE (%)</b> |
|---------------------|--------------------------------|------------------------------------------------|---------------|----------------|
| <b>0 wt%</b>        | <b>1.101</b>                   | <b>21.99</b>                                   | <b>76.36</b>  | <b>18.50</b>   |
| 1.0 wt%             | 1.104                          | 22.72                                          | 75.61         | 18.97          |
| 2.0 wt%             | 1.112                          | 22.61                                          | 77.32         | 19.45          |
| 3.0 wt%             | 1.112                          | 22.80                                          | 77.89         | 19.76          |
| 4.0 wt%             | 1.112                          | 23.27                                          | 78.27         | 20.27          |
| <b>5.0 wt%</b>      | <b>1.112</b>                   | <b>23.55</b>                                   | <b>78.96</b>  | <b>20.69</b>   |
| 6.0wt%              | 1.110                          | 23.08                                          | 78.13         | 20.02          |
| 10.0 wt%            | 1.104                          | 22.98                                          | 77.26         | 19.62          |
| 15.0 wt%            | 1.106                          | 22.90                                          | 76.26         | 19.32          |

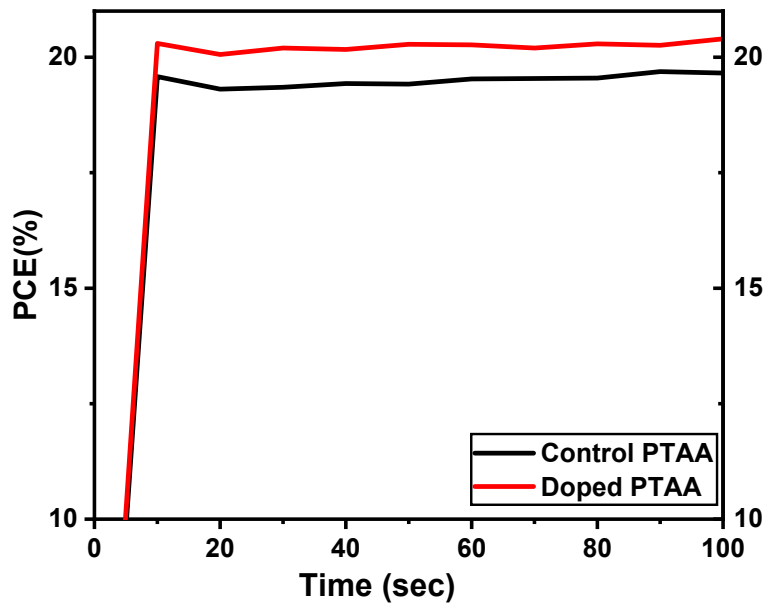

Fig. S6 Steady state PCE of PSCs for 100 seconds with and without T35FP dopant.

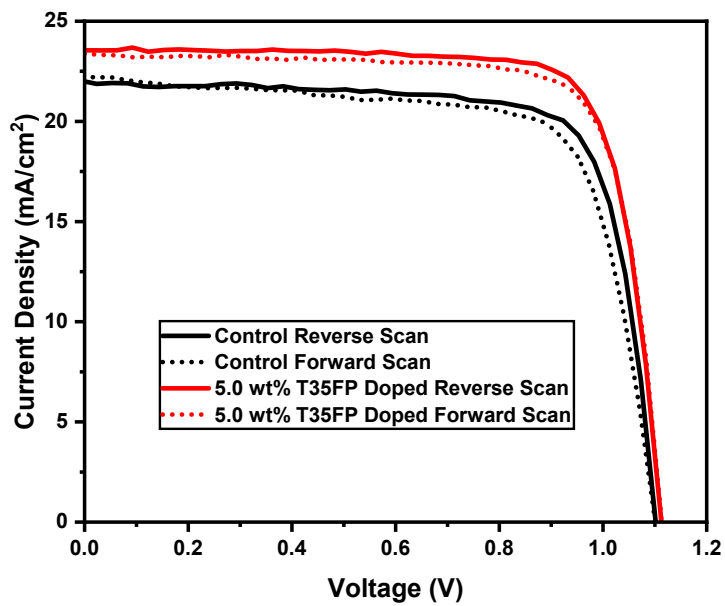

Fig. S7 J-V curves of the PSCs with different scan directions.

**Table S3** Hysteresis index for the devices made with control and doped PTAA layers

| Scan direction              | $V_{oc}$ (V) | $J_{sc}$ (mA/cm <sup>2</sup> ) | FF (%) | PCE (%) | HI    |
|-----------------------------|--------------|--------------------------------|--------|---------|-------|
| Control reverse             | 1.101        | 21.99                          | 76.36  | 18.50   | 0.042 |
| Control Forward             | 1.100        | 22.24                          | 72.44  | 17.73   |       |
| 5.0 wt% T35FP Doped Reverse | 1.112        | 23.55                          | 78.96  | 20.69   | 0.020 |
| 5.0 wt% T35FP Doped Forward | 1.113        | 23.36                          | 77.95  | 20.27   |       |

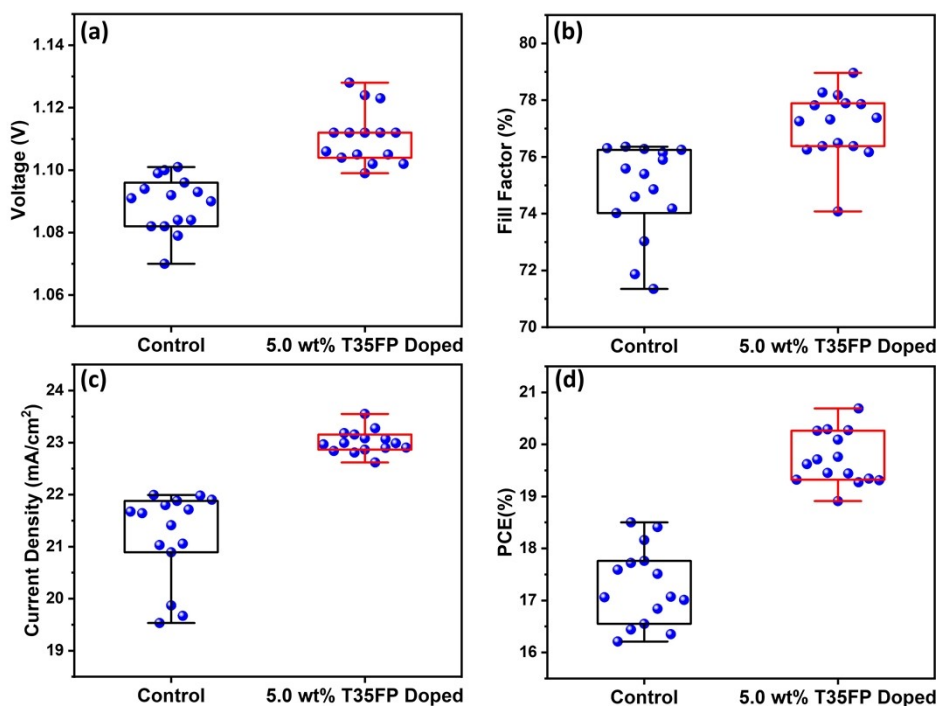

**Fig. S8** Statistical distribution of photovoltaic characteristics (a)  $V_{oc}$ , (b) FF (c)  $J_{sc}$  and (d) PCE for the 15 PSCs.

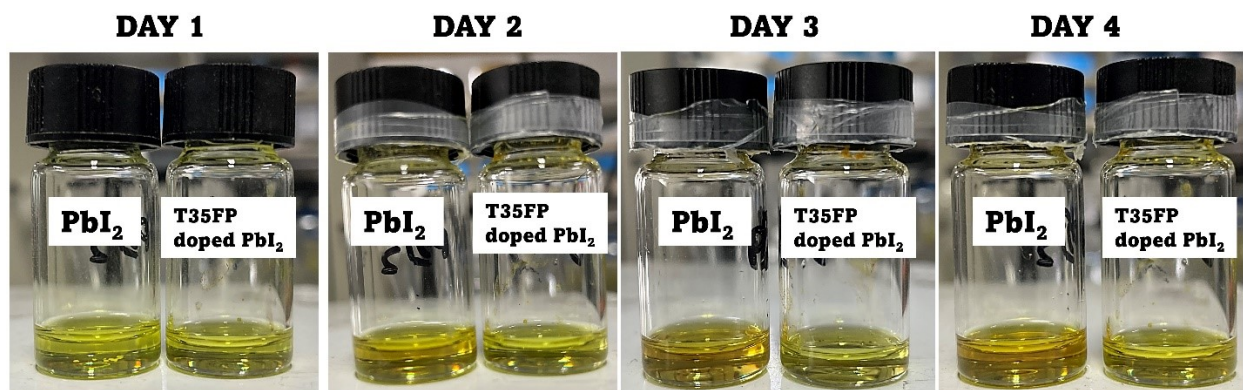

**Fig. S9** Images of  $\text{PbI}_2$  (in DMF) precursors, both the control and doped with T35FP, stored in air for four days.
